# Supplementary material
Source: PubMed Central journal article supplement (PMC4359924)
Supplement: supp_128.6.1204_JCS165712.pdf [file supp_128.6.1204_JCS165712.pdf]

## SUPPLEMENTAL FIGURE

### Fig. S1 *rod<sup>Z3</sup>*-derived embryos do not reach gastrulation.

Representative images of WT and *rod<sup>Z3</sup>*-derived 3-5 hour embryos stained for DNA at the furthest stage of development. Scale bars, 50  $\mu\text{m}$ . *rod<sup>Z3</sup>*-derived embryos contain abnormally large and irregularly distributed blastoderm nuclei.

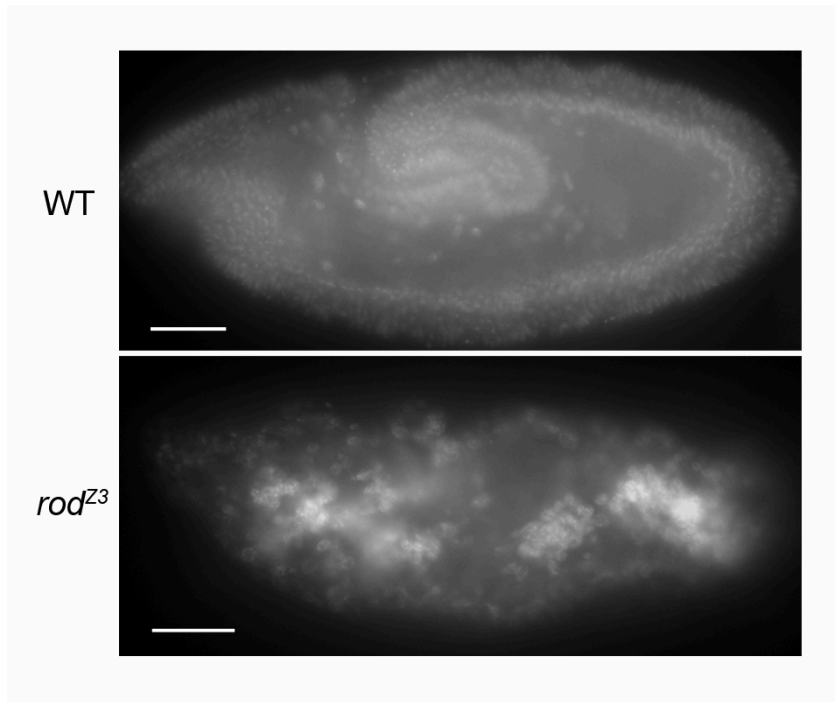

Fig S1
